# Supplementary material
Source: Springer Nature journal article supplement (https://www.springermedizin.de/resource/supplementary/13023_2009_179_MOESM3_ESM.pdf/9641800)
Supplement: MOESM3 [file 9641800]

- Bone marrow (useful, not mandatory): May show foam cells (filipin + if tested for this stain)
- If a liver biopsy is performed for cholestatic liver disease, fixation for EM study is essential
- Serum chitotriosidase: useful, not mandatory; generally (not always) elevated activity
- **Isolated (hepato)splenomegaly : enzymatic exclusion of Gaucher and Niemann-Pick B = prerequisite**
- **Provide the laboratory with sufficient clinical data** (essential for correct interpretation of the results)

## SKIN BIOPSY

- If local situation permits: fixation and EM study
- **Fibroblast culture** (mandatory)

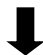

### FILIPIN TEST

(cell biology) (done twice)

**Highly positive**

« classical »  
(85% of NP-C patients)

**Moderately positive**  
with pure LDL, « variant »  
(15% of NP-C patients)

**Difficult Interpretation\***  
(3-5% of NP-C patients)

**Clearly negative**

**Nearly sure NP-C\*\***

**Probable “variant” NP-C\*\*\***

Re-assess clinical features  
*Reference Centre* Complementary investigations  
If likely diagnosis, gene sequencing

**a priori, not NP-C**

**Kinetics of LDL-induced  
cholesteryl ester  
formation**

**NPC1 Gene**  
Mutation p.P1007A  
and codon 992\*\*\*\*

## Sequencing of NPC1 and NPC2 genes

- Depending on countries, study first *NPC1* p. I1061T or other most prevalent common mutation
- Conclude quickly on *NPC2* if child < 8-10 months
- *NPC1*: numerous polymorphisms!!! – check allele segregation from parental study
- often need to study both gDNA and cDNA
